# Supplementary material
Source: Research Square preprint supplement (doi:10.21203/rs.3.rs-9498628/v1)

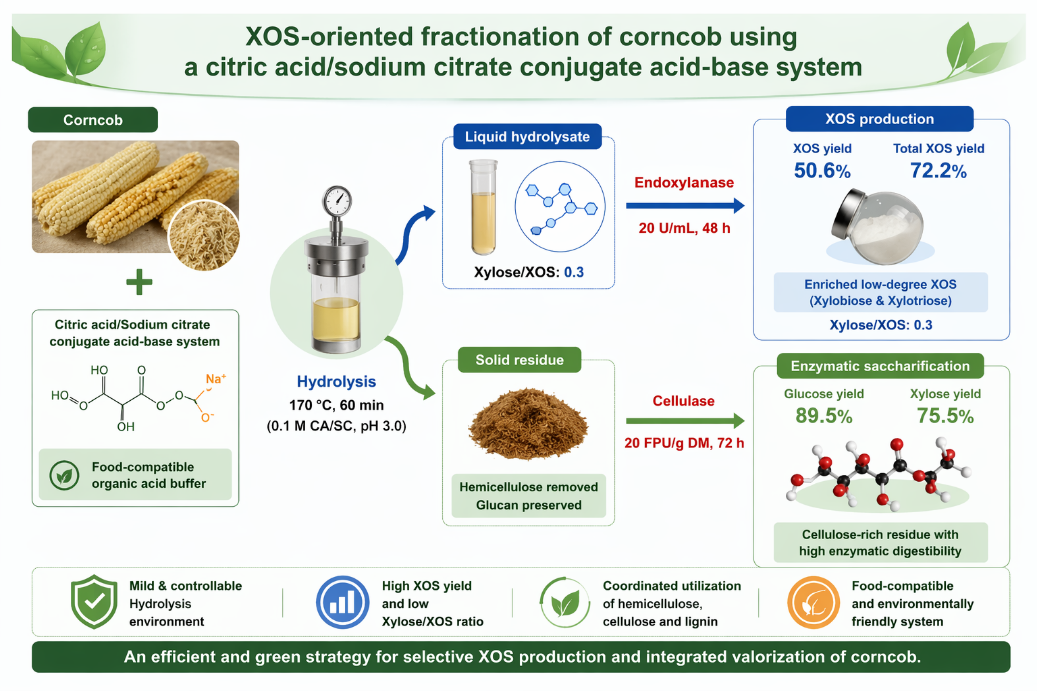

Supplement: Supplementary file 1 [file 01b9c6fba44f8e0959d2bc61.docx]
